# Supplementary material
Source: PubMed Central journal article supplement (PMC5336497)
Supplement: ajcr0007-0218-f9.pdf [file ajcr0007-0218-f9.pdf]

miR-429 mediates tumor growth and metastasis

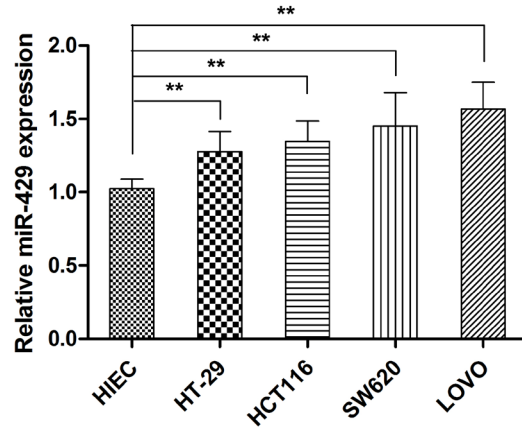

Supplementary Figure 1. Expression of miR-429 in CRC cells. \*\*P<0.01.

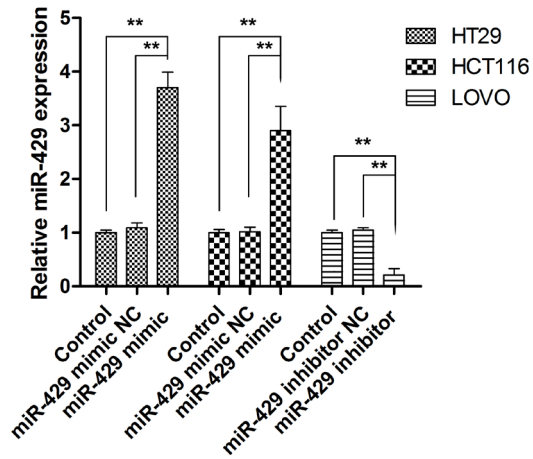

Supplementary Figure 2. Expression of miR-429 in CRA transfected with miR-429 mimic or inhibitor. \*\*P<0.01.
